# Supplementary material for: Effects of flocculant-modified phosphogypsum on sludge treatment: investigation of the operating parameters, variations of the chemical groups, and heavy metals in the sludge
Source: Royal Society of Chemistry journal article supplement (doi:10.1039/d0ew00805b), 2020-11-04
Supplement: d0ew00805b1.pdf [file d0ew00805b1.pdf]

Tables:

Table S1 Active groups in sludge filter cake and filtration

Table S1 Active groups in sludge filter cake and filtration

| Active groups        | Chemical bond                                                       | Sludge filter cake |         | Sludge filtration |         |
|----------------------|---------------------------------------------------------------------|--------------------|---------|-------------------|---------|
|                      |                                                                     | Raw                | Treated | Raw               | Treated |
|                      |                                                                     | sludge             | sludge  | sludge            | sludge  |
| Alcohol hydroxyl (a) | a1(O-H)+a2(C-O)                                                     | D <sup>a</sup>     | D       | D                 | D       |
| Amidogen (b)         | b1(Stretching, N-H)+b2(Deformation, N-H)+b3 (Bending, N-H) +b4(C-N) | D                  | D       | D                 | D       |
| Carboxyl (c)         | c1(O-H)+c2(C-O)+c3(C=O)                                             | D                  | D       | D                 | D       |
| Aldehyde group (d)   | d1(C-H)+d2(C-H)+d3(C=O)                                             | D                  | D       | ND <sup>b</sup>   | D       |
| Phenolic hydroxyl(e) | e1(O-H)+e2(C-O)+e3(C=C)+e4(C=C)                                     | D                  | D       | ND                | D       |
| Quinonyl (f)         | f1(C=O)+f2(C=C)                                                     | D                  | D       | ND                | D       |
| Phosphate group (g)  | g(P=O)                                                              | D                  | D       | ND                | D       |
| Sulfate group (h)    | h1(O-H)+h2(S=O)                                                     | D                  | D       | ND                | D       |

<sup>a</sup> Detected—D; <sup>b</sup> Not Detected—ND
